# Supplementary material
Source: MDPI journal article supplement (https://www.mdpi.com/2624-862X/2/3/28)
Supplement: s1 [file s1]

## Monitoring the Transition Period in Dairy Cows through $^1\text{H}$ NMR-Based Untargeted Metabolomics

*Andrés López Radcenco, María de Lourdes Adrien, Gretel Ruprecht, Elena de Torres, Ana Meikle, and Guillermo Moyna*

### Supplementary Materials

**Table S1.** Monthly postpartum diet composition estimate.

| Month    | Components <sup>a</sup> |              |         | Total offered |
|----------|-------------------------|--------------|---------|---------------|
|          | Soybean hull            | Maize silage | Pasture |               |
| February | 5                       | 2            | 11      | 18            |
| March    | 5                       | 11           | 2       | 18            |
| April    | 5                       | 9            | 5       | 19            |
| May      | 6                       | 11           | 2       | 19            |
| June     | 6                       | 11           | 2       | 19            |

<sup>a</sup> Kg of dry matter per cow per day.

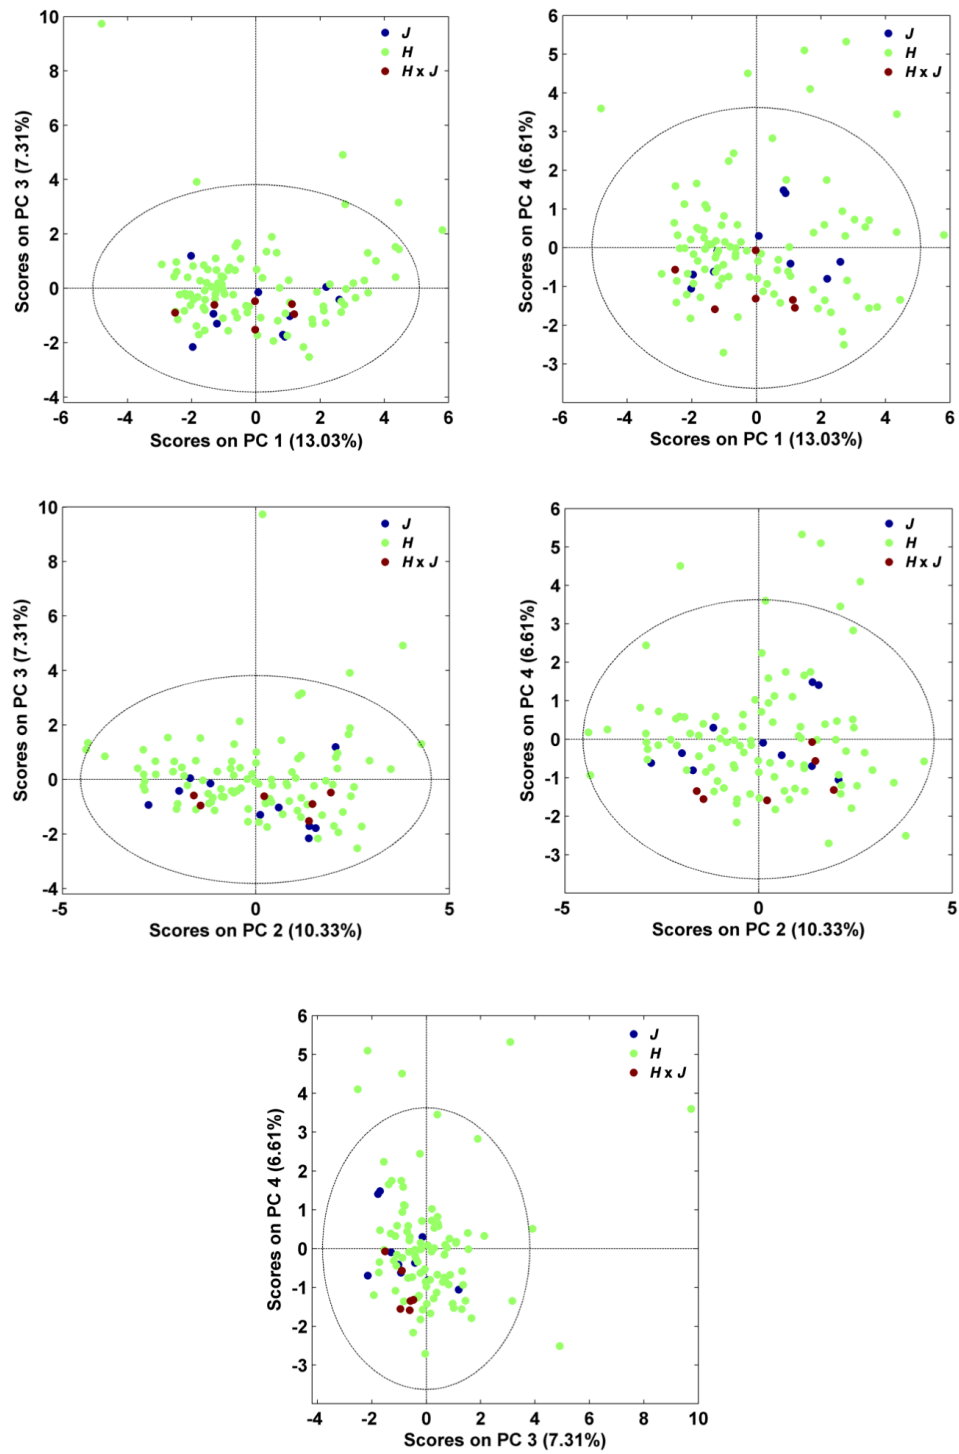

**Figure S1.** Additional PCA score plots colored according to breed.

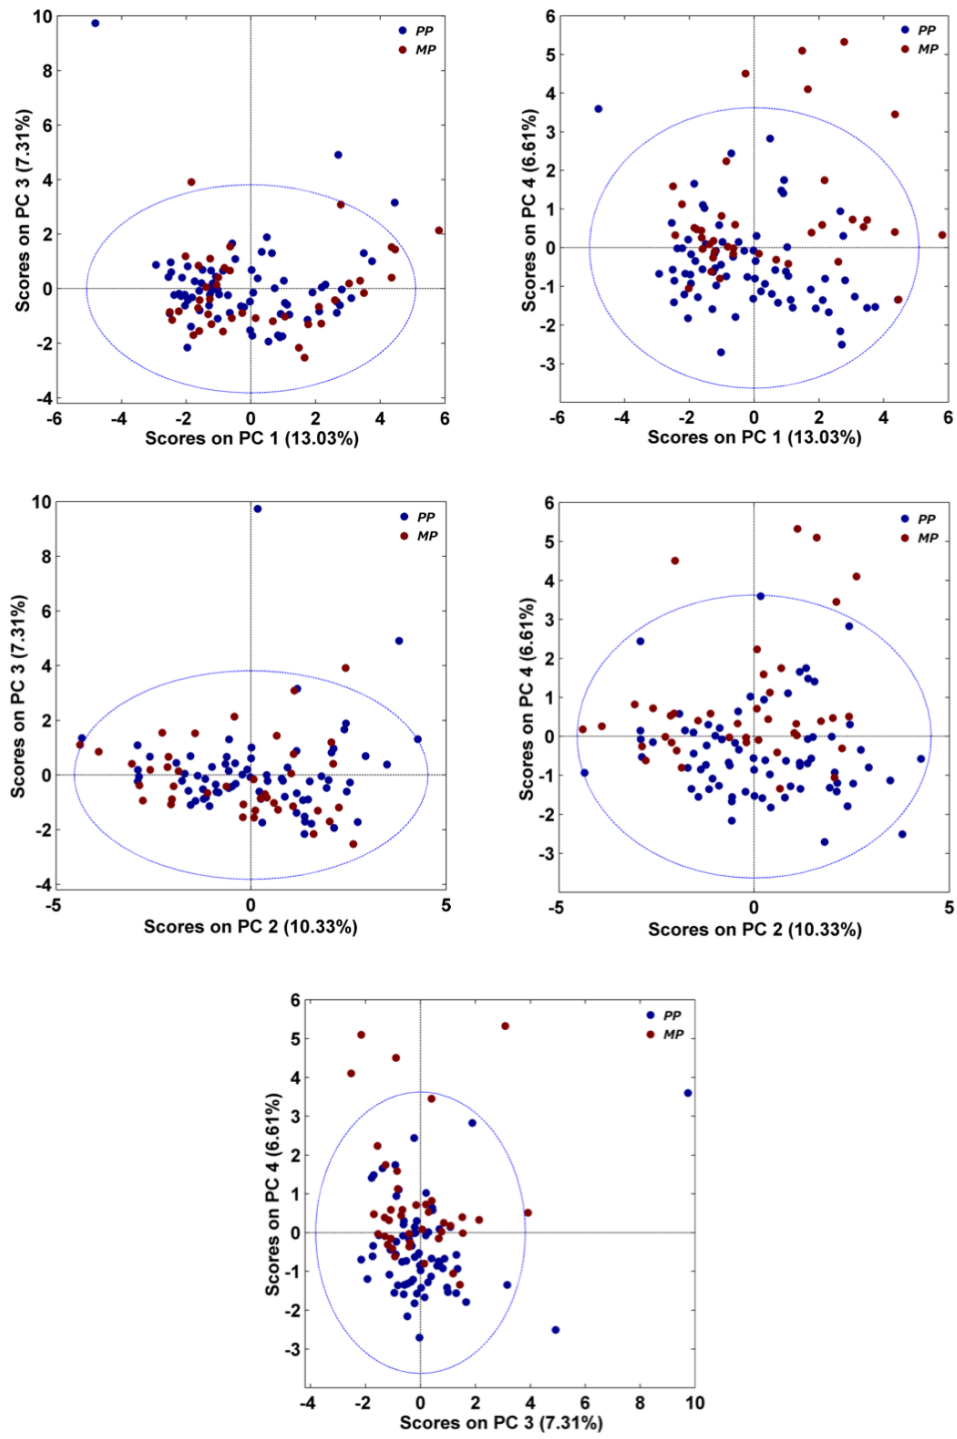

**Figure S2.** Additional PCA score plots colored according to parity.

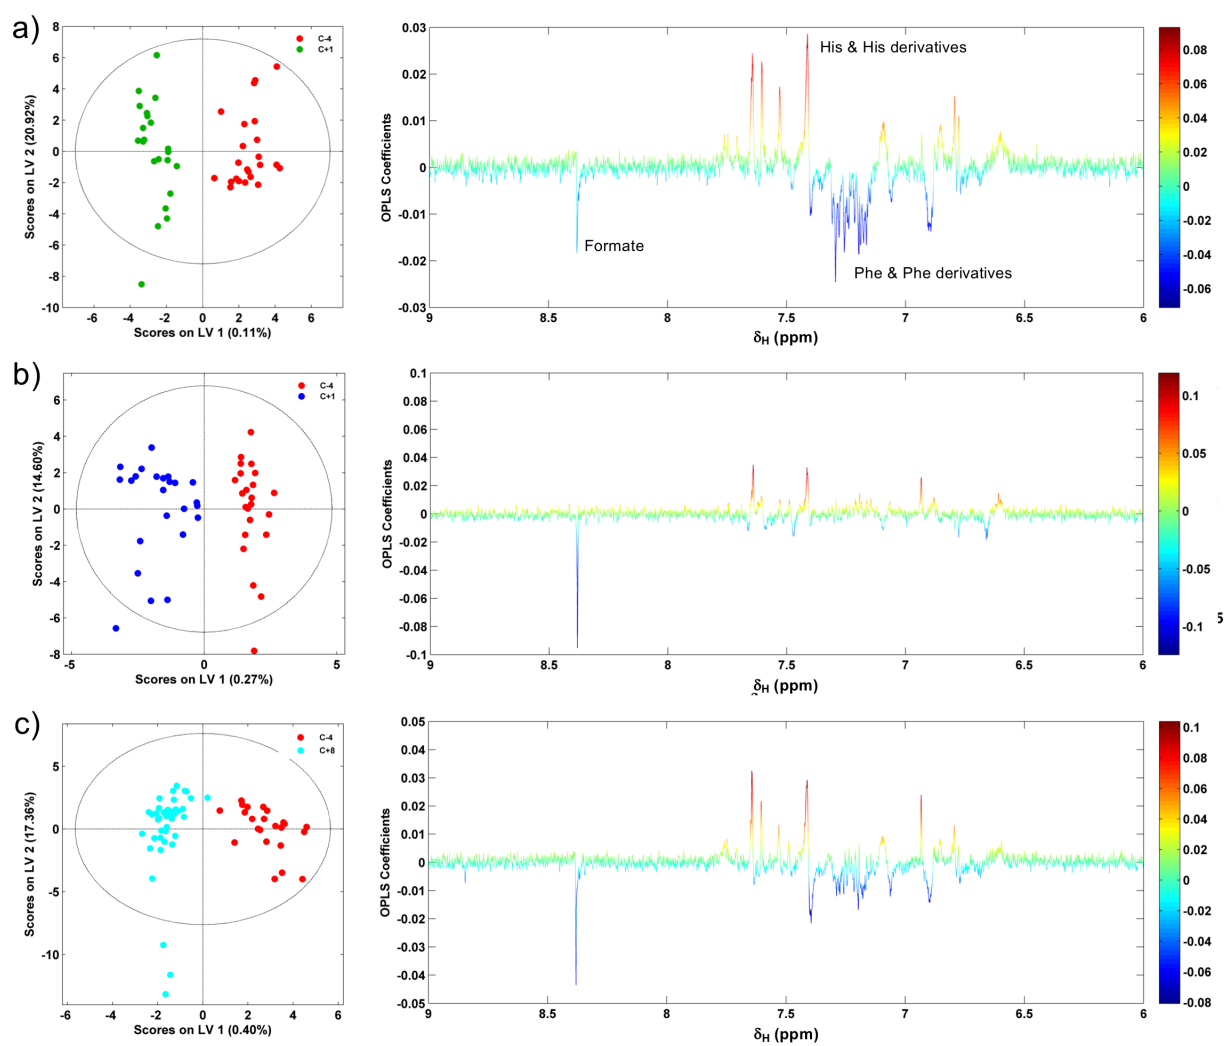

**Figure S3.** Score and loading factor plots obtained from the OPLS-DA for data in the 6.0 to 9.0 ppm range comparing prepartum (C-4) and first (C+1) (a), second (C+4) (b), and third (C+8) (c) postpartum groups. Validations of these models are detailed in Figures S10-S15.

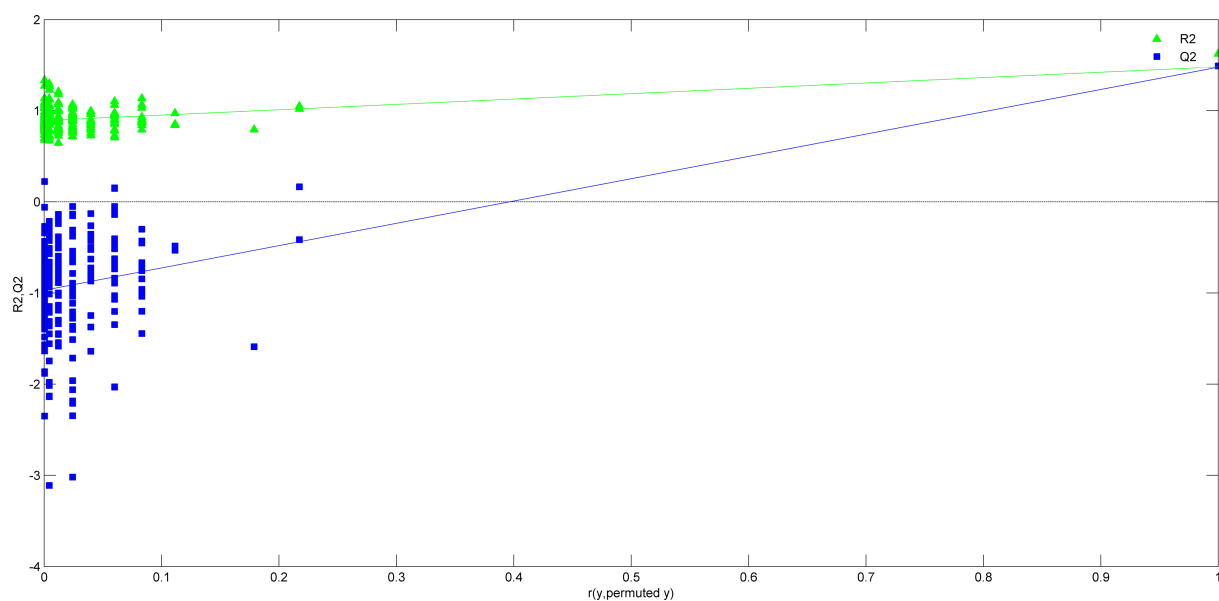

**Figure S4.** Permutation test plots for the OPLS-DA model comparing the C-4 and the C+1 stages ( $R^2Y = 0.80$  and  $Q^2Y = 0.72$ ).

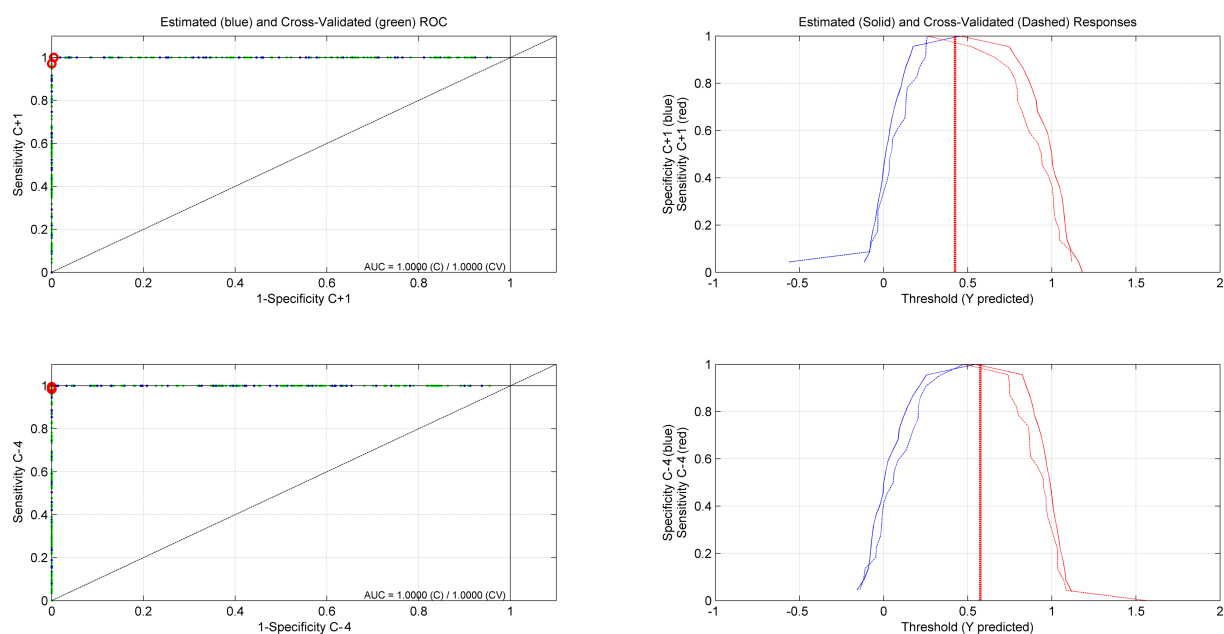

**Figure S5.** ROC analysis curves derived from the OPLS-DA model comparing the C-4 and the C+1 stages (AUC = 1.00).

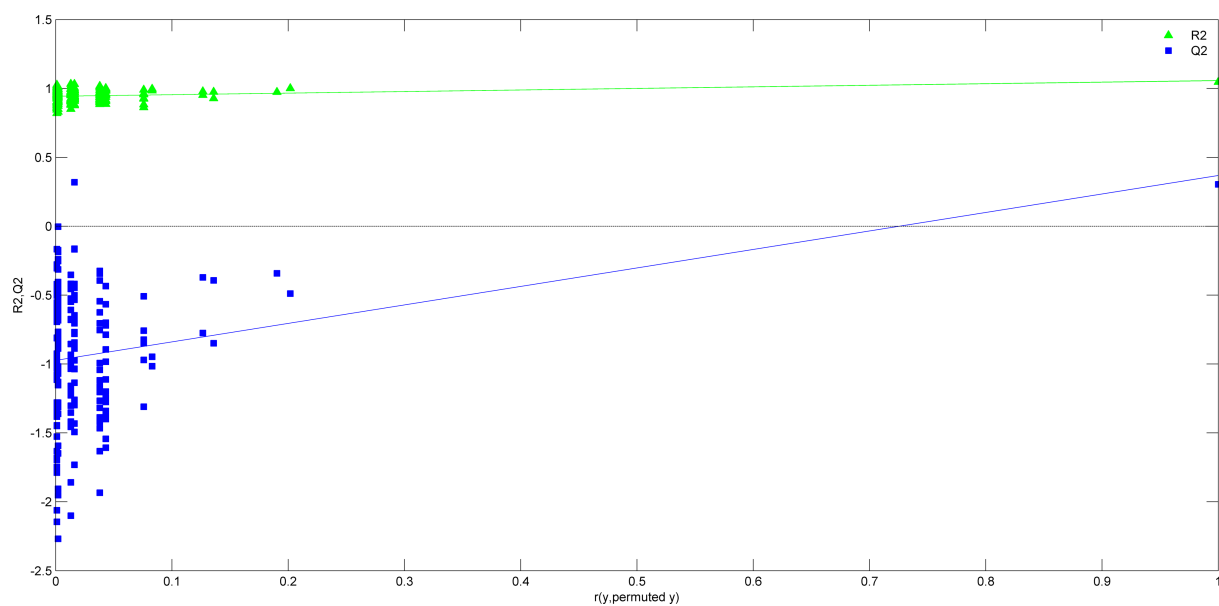

**Figure S6.** Permutation test plots for the OPLS-DA model comparing the C-4 and the C+4 stages ( $R^2Y = 0.89$  and  $Q^2Y = 0.37$ ).

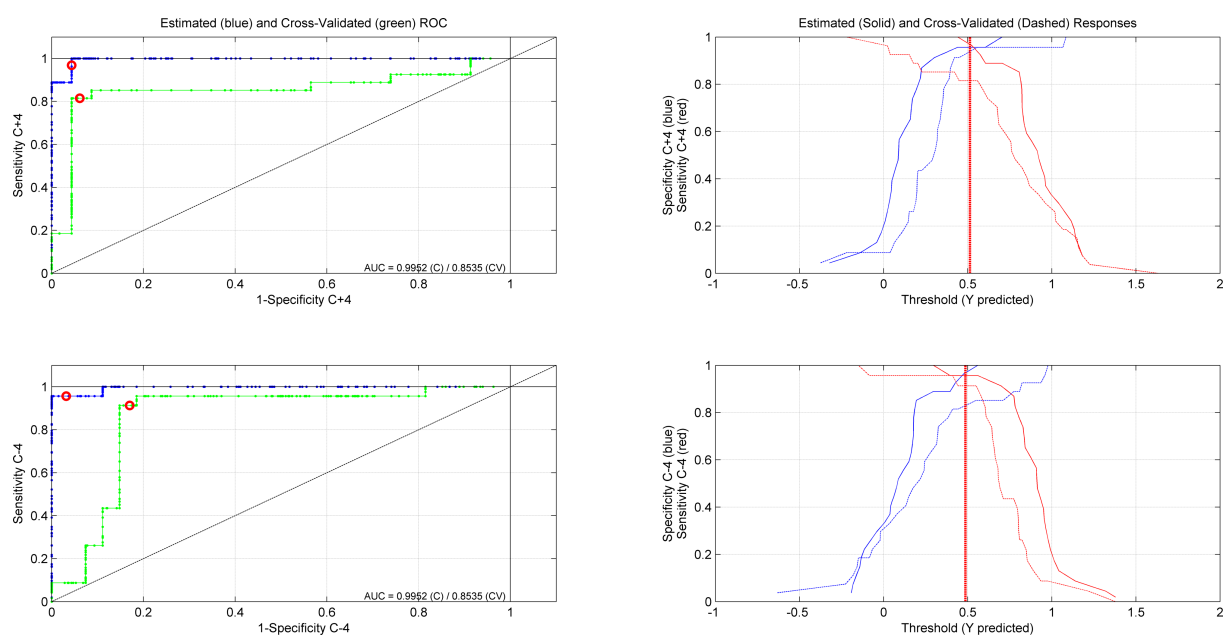

**Figure S7.** ROC analysis curves derived from the OPLS-DA model comparing the C-4 and the C+4 stages (AUC = 0.85).

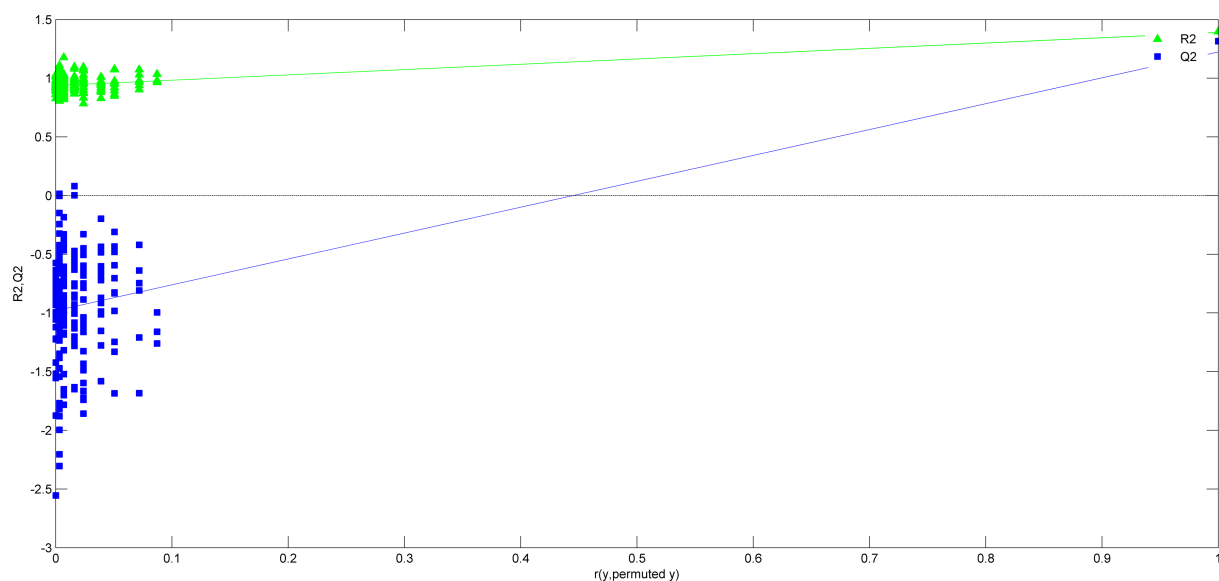

**Figure S8.** Permutation test plots for the OPLS-DA model comparing the C-4 and the C+8 stages ( $R^2Y = 0.94$  and  $Q^2Y = 0.87$ ).

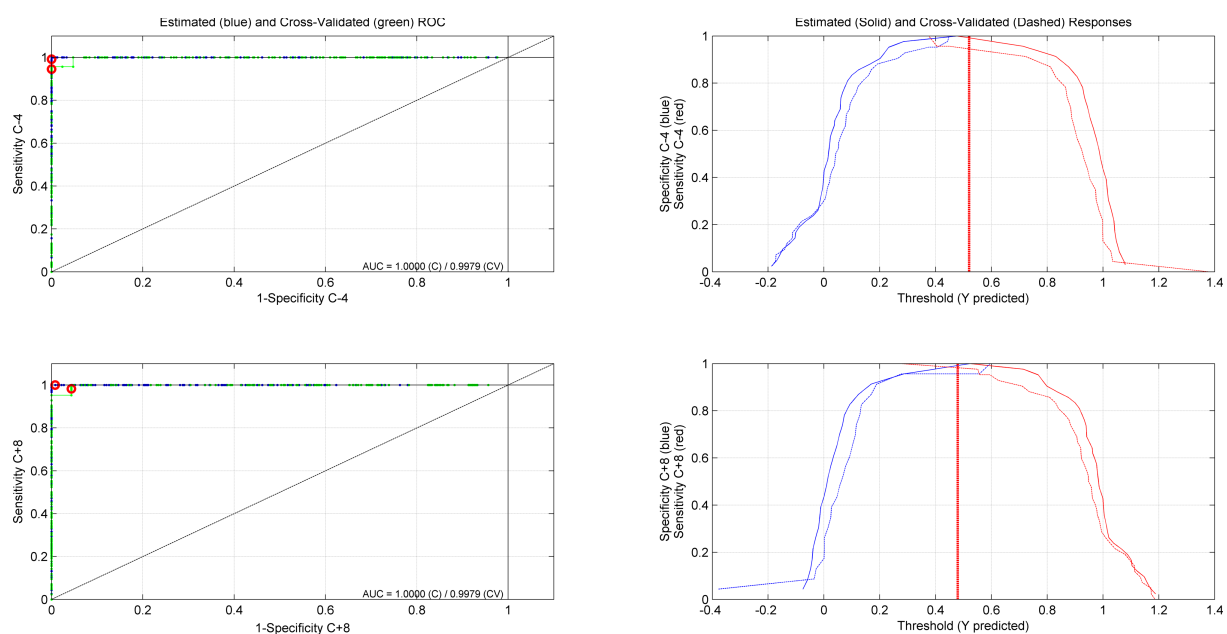

**Figure S9.** ROC analysis curves derived from the OPLS-DA model comparing the C-4 and the C+8 stages ( $AUC = 0.99$ ).

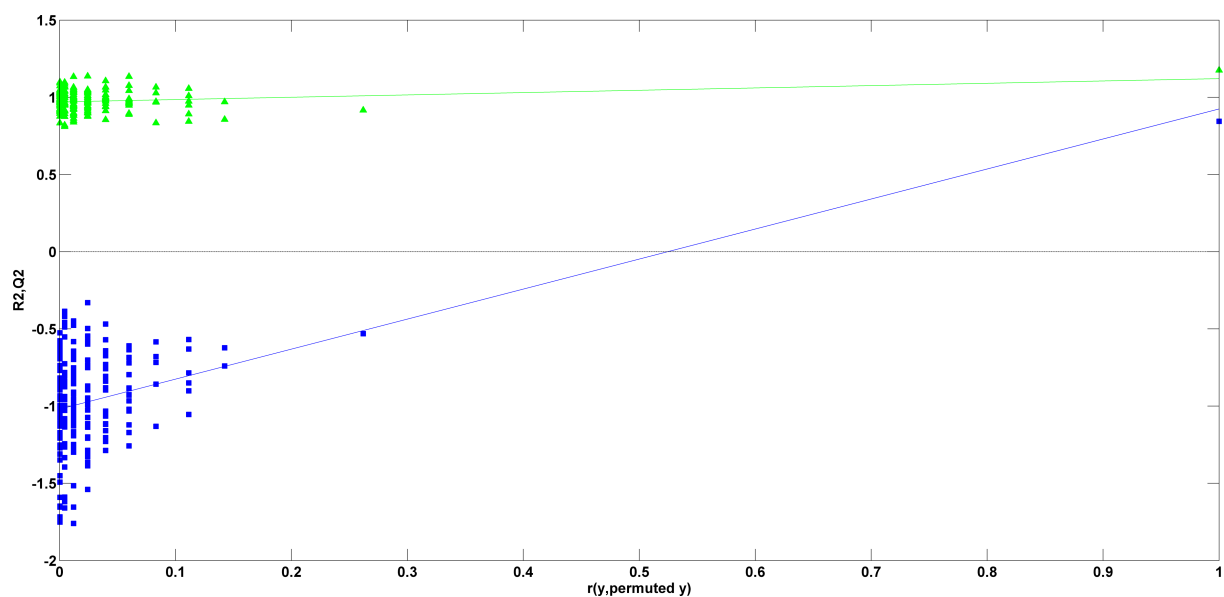

**Figure S10.** Permutation test plots for the OPLS-DA model for data in the 6.0 to 9.0 ppm range comparing the C-4 and the C+1 stages ( $R^2Y = 0.84$  and  $Q^2Y = 0.66$ ).

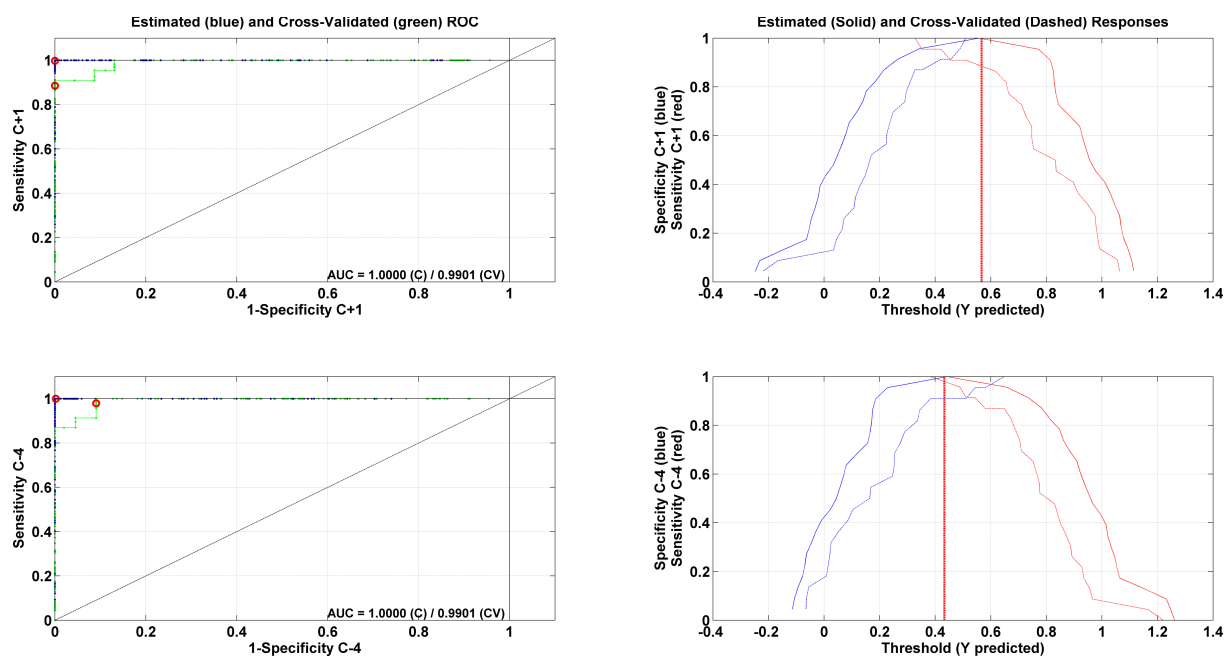

**Figure S11.** ROC analysis curves derived from the OPLS-DA model for data in the 6.0 to 9.0 ppm range comparing the C-4 and the C+1 stages ( $AUC = 0.99$ ).



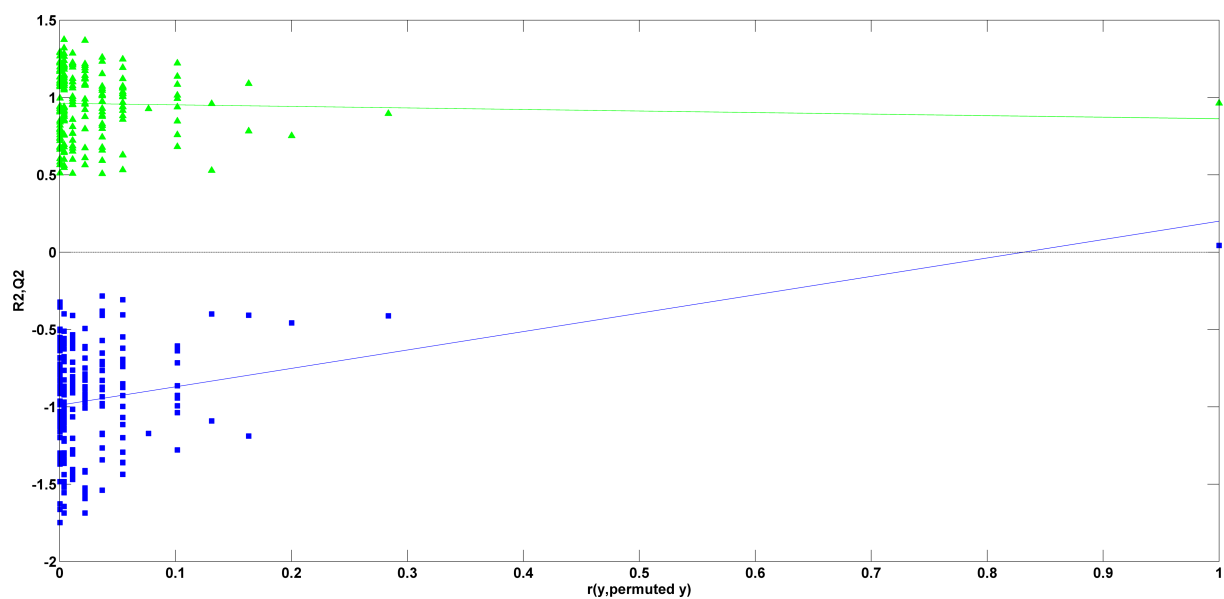

**Figure S12.** Permutation test plots for the OPLS-DA model for data in the 6.0 to 9.0 ppm range comparing the C-4 and the C+4 stages ( $R^2Y = 0.66$  and  $Q^2Y = 0.20$ ).

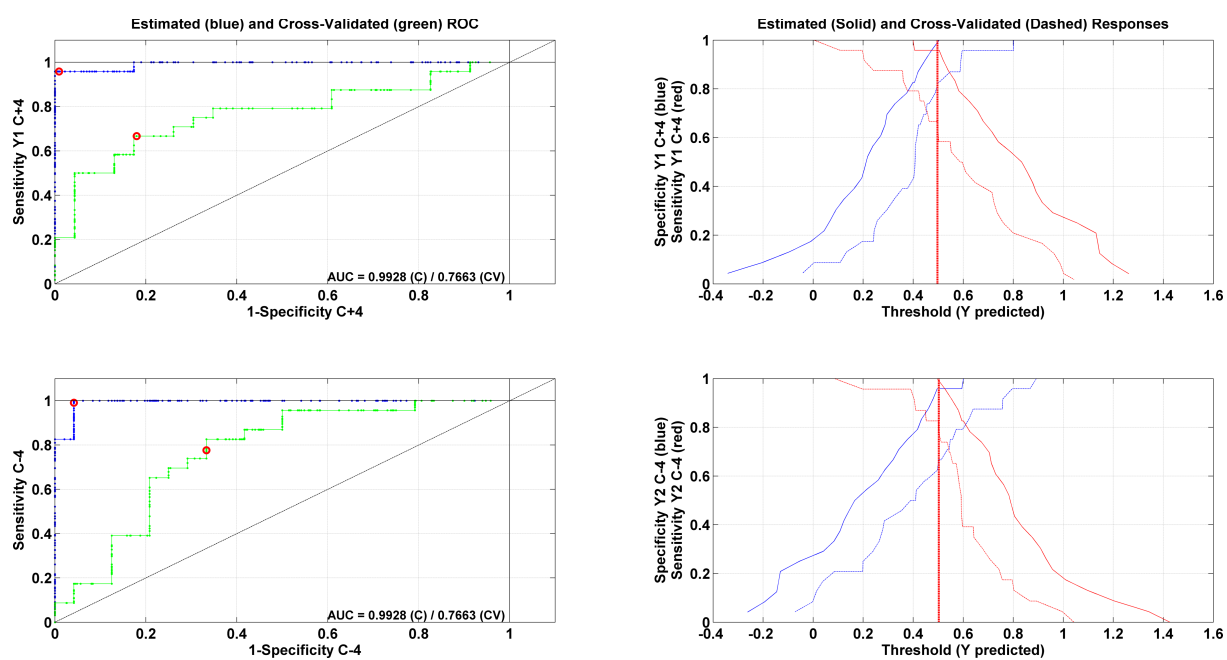

**Figure S13.** ROC analysis curves derived from the OPLS-DA model for data in the 6.0 to 9.0 ppm range comparing the C-4 and the C+4 stages ( $AUC = 0.77$ ).

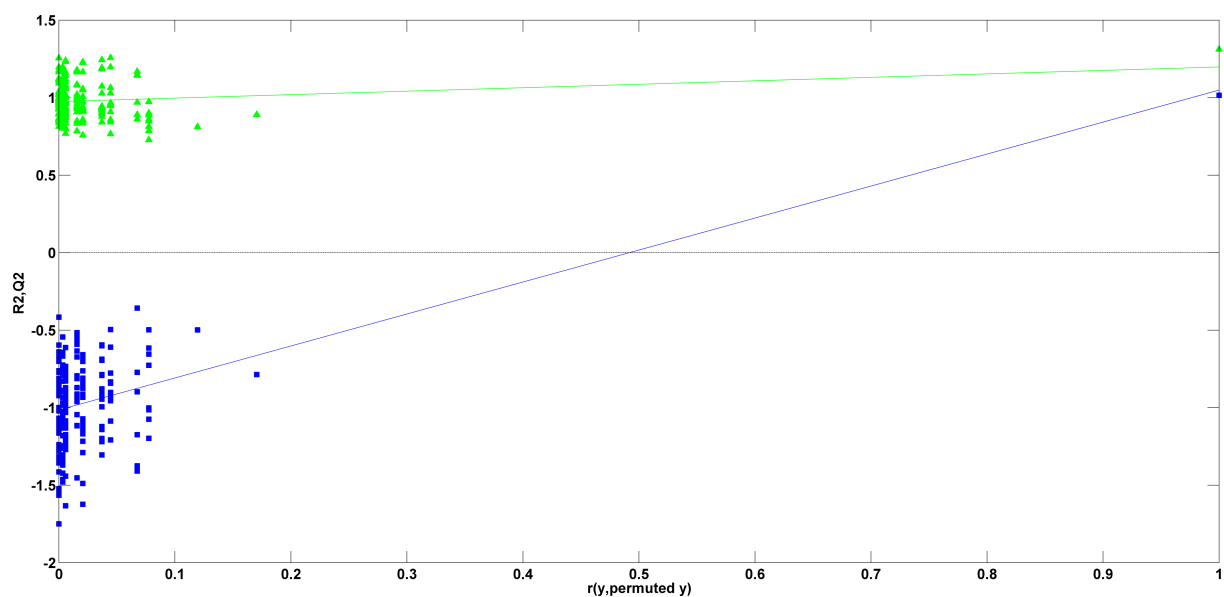

**Figure S14.** Permutation test plots for the OPLS-DA model for data in the 6.0 to 9.0 ppm range comparing the C-4 and the C+8 stages ( $R^2Y = 0.78$  and  $Q^2Y = 0.66$ ).

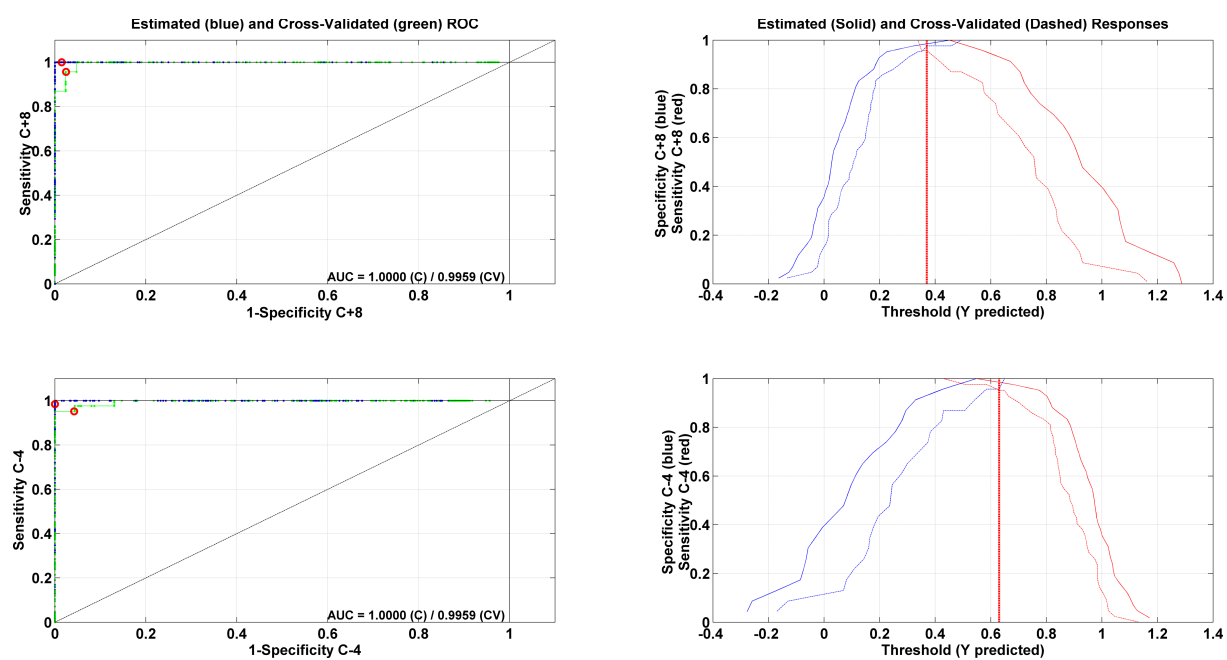

**Figure S15.** ROC analysis curves derived from the OPLS-DA model for data in the 6.0 to 9.0 ppm comparing the C-4 and the C+8 stages ( $AUC = 0.99$ ).

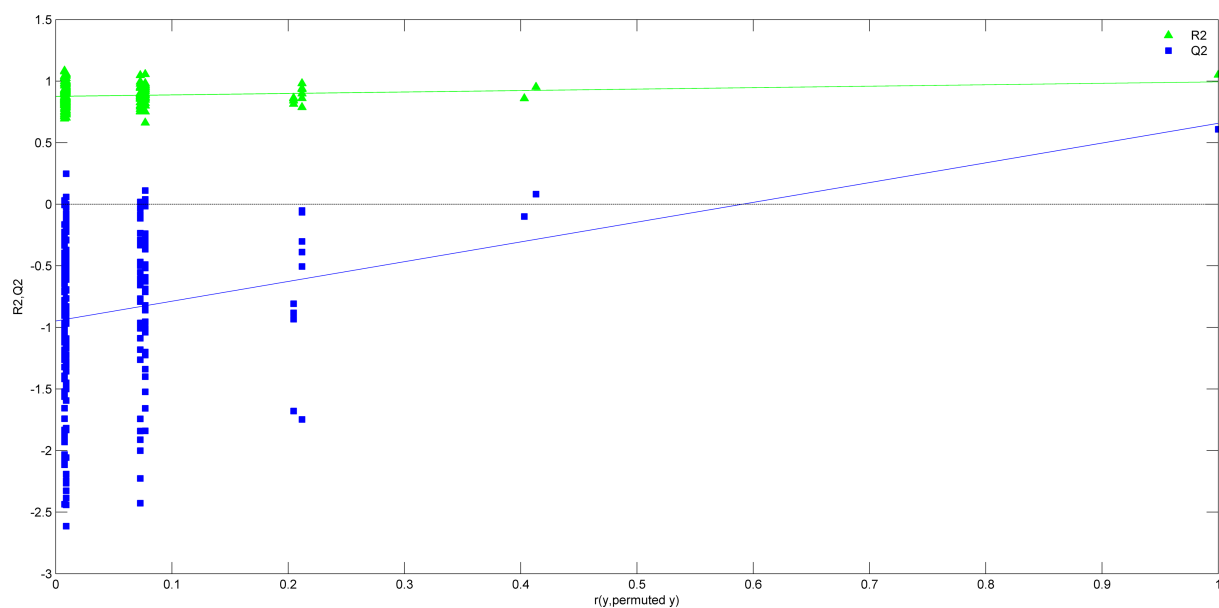

**Figure S16.** Permutation test plots for the OPLS-DA model comparing primiparous and multiparous dairy cows within the C-4 stage ( $R^2Y = 0.82$  and  $Q^2Y = 0.56$ ).

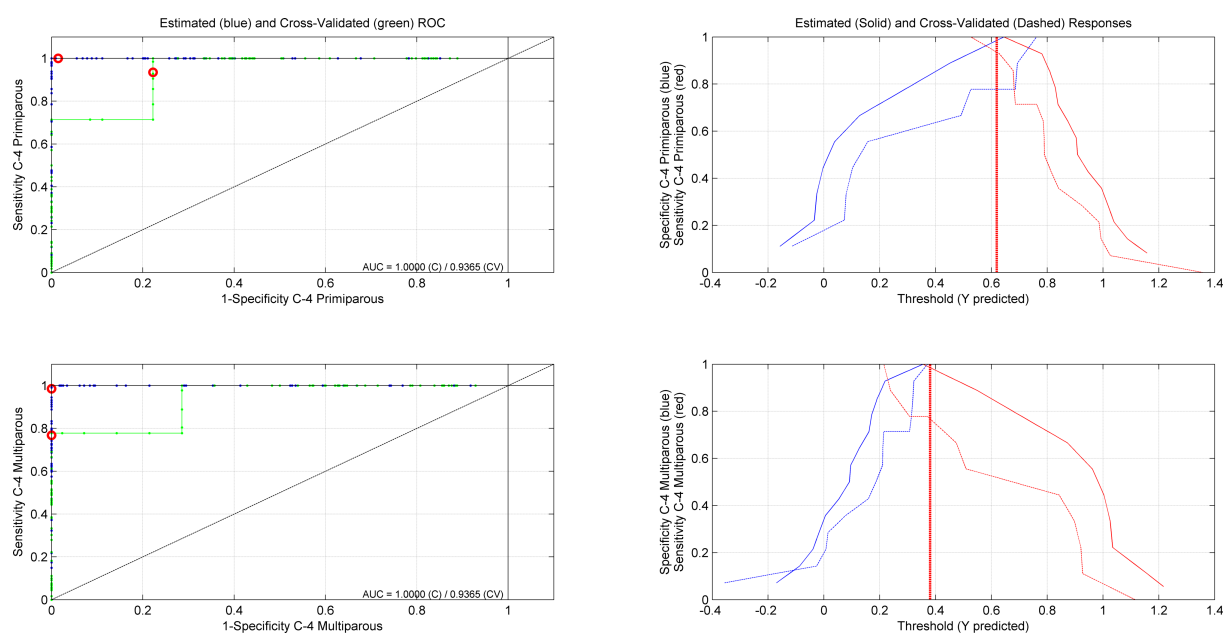

**Figure S17.** ROC analysis curves derived from the OPLS-DA model comparing primiparous and multiparous dairy cows within the C-4 stage (AUC = 0.93).
