# Supplementary material
Source: MDPI journal article supplement (https://www.mdpi.com/2624-862X/2/3/28)
Supplement: s1 [file s1]

Archive with 1 entries (1 files):
- dairy-1170669-supplementary.pdf
